# Supplementary material for: Synthesis of thermo-responsive glycopolymers via copper catalysed azide–alkyne ‘click’ chemistry for inhibition of ricin: the effect of spacer between polymer backbone and galactose
Source: Royal Society of Chemistry journal article supplement (doi:10.1039/c1py00048a), 2011-01-01
Supplement: c1py00048a.pdf [file c1py00048a.pdf]

SUPPORTING INFO

## Synthesis of thermo-responsive glycopolymers via Copper Catalysed Azide-Alkyne 'Click' Chemistry for Inhibition of Ricin: The Effect of Spacer between Polymer Backbone and Galactose

Jatin Kumar, Lyndal McDowall, Gaojian Chen, Martina H. Stenzel

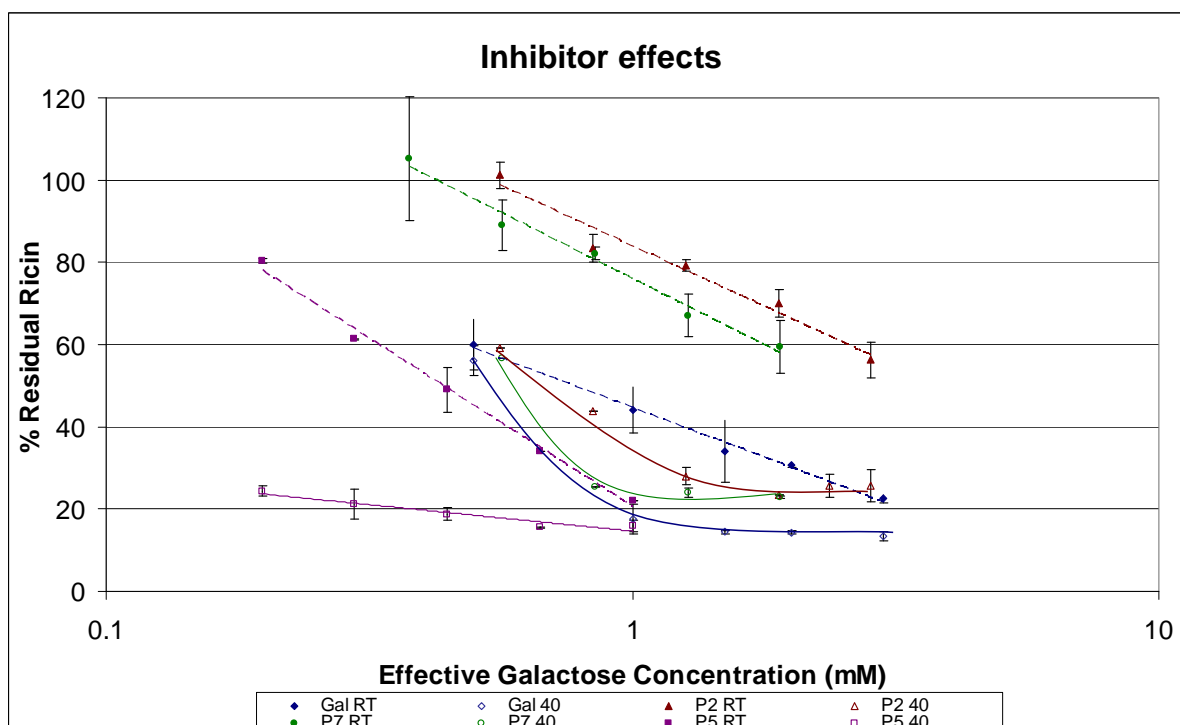

Ricin inhibition assay at 20 and 40 °C using Galactose (Gal) and polymer 2, 5, 7 (see Table 4)
